# Supplementary material for: Attributable Fractions of Nonalcoholic Fatty Liver Disease for Mortality in the United States: Results From the Third National Health and Nutrition Examination Survey With 27 Years of Follow‐up
Source: PubMed Central journal article supplement — Hepatology. 2020 Aug 25;72(2):430–40. doi: 10.1002/hep.31040 (PMC7496113; doi:10.1002/hep.31040), 2020-08-25
Supplement: HEP-72-430-s001.pdf [file HEP-72-430-s001.pdf]

**Supporting TABLE S1. International Classification of Diseases, Tenth Revision, 113 Selected Causes of Death**

|                               |                                                                                                                                                                                                                                                                                                                                                                                                                                                                                                                                                                                                                                                                                                                        |
|-------------------------------|------------------------------------------------------------------------------------------------------------------------------------------------------------------------------------------------------------------------------------------------------------------------------------------------------------------------------------------------------------------------------------------------------------------------------------------------------------------------------------------------------------------------------------------------------------------------------------------------------------------------------------------------------------------------------------------------------------------------|
| <b>Cardiovascular disease</b> | Major cardiovascular diseases (I00-I78); Diseases of heart (I00-I09, I11, I13, I20-I51); Hypertensive heart disease (I11); Hypertensive heart and renal disease (I13); Ischemic heart diseases (I20-I25); Acute myocardial infarction (I21-I22); Other acute ischemic heart diseases (I24); Other forms of chronic ischemic heart diseases (I20, I25); Atherosclerotic cardiovascular disease, so described (I25.0); All other forms of chronic ischemic heart disease (I20, I25.1-I25.9); Other heart diseases (I26-I51); Acute and subacute endocarditis (I33); Diseases of pericardium and acute myocarditis (I30-I31, I40); Heart failure (I50); All other forms of heart disease (I26-I28, I34-I38, I42-I49, I51) |
| <b>Cancer</b>                 | Malignant neoplasms of: Lip, oral cavity, and pharynx (C00-C14); Esophagus (C15); Stomach (C16); Colon, rectum, and anus (C18-C21); Pancreas (C25); Larynx (C32); Trachea, bronchus, and lung (C33-C34); Skin (C43); Breast (C50); Cervix uteri (C53); Corpus uteri and uterus, part unspecified (C54); Ovary (C56); Prostate (C61); Bladder (C67); Meninges, brain, and other parts of central nervous system (C70-C72); All other and unspecified malignant neoplasms (C17, C23-C24, C26-C31, C37-C41, C44-C49, C51-C52, C57-C60, C62-C63, C66, C68-C69, C73-C80, C97)                                                                                                                                               |
| <b>Liver disease</b>          | Malignant neoplasms of liver and intrahepatic bile ducts (C22); Other chronic liver disease and cirrhosis (K73-K74)                                                                                                                                                                                                                                                                                                                                                                                                                                                                                                                                                                                                    |
| <b>Diabetes mellitus</b>      | Diabetes mellitus (E10-E14)                                                                                                                                                                                                                                                                                                                                                                                                                                                                                                                                                                                                                                                                                            |

**Supporting TABLE S2. Hazard Ratios (HRs) and Population Attributable Fractions (PAFs) of NAFLD With Elevated Enzymes (NASH), NHANES III**

|                              | All    |                        | Men    |                        | Women  |                        | White  |                        | Black  |                        | Mexican American |                        |
|------------------------------|--------|------------------------|--------|------------------------|--------|------------------------|--------|------------------------|--------|------------------------|------------------|------------------------|
|                              | Deaths | HR <sup>a</sup> 95% CI | Deaths           | HR <sup>a</sup> 95% CI |
| <b>All causes</b>            |        |                        |        |                        |        |                        |        |                        |        |                        |                  |                        |
| No NAFLD                     | 1,886  | Ref                    | 977    | Ref                    | 909    | Ref                    | 839    | Ref                    | 565    | Ref                    | 432              | Ref                    |
| NAFLD, no elevated enzymes   | 1,247  | 1.17 (1.03, 1.33)      | 643    | 1.14 (0.97, 1.34)      | 604    | 1.23 (1.04, 1.44)      | 577    | 1.23 (1.05, 1.44)      | 271    | 1.11 (0.91, 1.34)      | 371              | 1.00 (0.91, 1.34)      |
| NAFLD, with elevated enzymes | 167    | 1.58 (1.21, 2.08)      | 94     | 1.59 (1.08, 2.36)      | 73     | 1.51 (1.04, 2.19)      | 52     | 1.81 (1.26, 2.58)      | 34     | 1.55 (1.07, 2.24)      | 79               | 1.10 (0.84, 1.44)      |
| <b>Liver disease</b>         |        |                        |        |                        |        |                        |        |                        |        |                        |                  |                        |
| No NAFLD                     | 24     | Ref                    | 10     | Ref                    | 14     | Ref                    | <5     | Ref                    | 7      | Ref                    | 12               | Ref                    |
| NAFLD, no elevated enzymes   | 17     | 1.03 (0.44, 2.42)      | 8      | 1.74 (0.44, 6.94)      | 9      | 0.78 (0.20, 3.04)      | <5     | 1.37 (0.42, 4.46)      | <5     | 0.38 (0.06, 2.46)      | 11               | 1.44 (0.39, 3.29)      |
| NAFLD, with elevated enzymes | 10     | 7.75 (3.20, 18.77)     | <5     | 12.63 (1.94, 82.12)    | 6      | 7.00 (1.44, 33.97)     | <5     | 13.86 (5.29, 36.35)    | <5     | 5.85 (1.47, 23.31)     | 6                | 3.07 (0.64, 14.90)     |

<sup>a</sup>Adjusted by age, gender, race/ethnicity, education, physical activity, smoking, alcohol, and BMI.

<sup>b</sup>Indicates the number of deaths is <5.
